# Supplementary material for: LbL-assembled gentamicin delivery system for PMMA bone cements to prolong antimicrobial activity
Source: PLoS One. 2018 Dec 13;13(12):e0207753. doi: 10.1371/journal.pone.0207753 (PMC6292632; doi:10.1371/journal.pone.0207753)
Supplement: S1 Table — (XLSX) [file pone.0207753.s001.xlsx]

## Sheet: Palacos R+G
Palacos R+G
	time	G'	G"	tan delta
	[min]	[Pa]	[Pa]	[1]
	1.125	27848	16272	0.584
	1.16685	34227	18723	0.547
	1.20835	41265	21562	0.523
	1.24985	48419	24429	0.505
	1.29185	55988	27759	0.496
	1.33335	63504	30977	0.488
	1.37485	71628	34233	0.478
	1.41685	79824	37656	0.472
	1.45835	88562	41142	0.465
	1.49985	97114	44635	0.46
	1.54185	106000	48012	0.455
	1.58335	115000	51885	0.451
	1.62335	124000	55854	0.452
	1.66835	134000	59449	0.444
	1.70835	144000	63438	0.442
	1.74835	154000	67534	0.439
	1.79335	164000	71744	0.437
	1.83335	175000	76049	0.435
	1.87335	186000	80595	0.433
	1.91835	197000	85087	0.431
	1.95835	209000	89599	0.429
	1.99835	221000	94413	0.427
	2.04335	234000	99429	0.426
	2.08335	247000	105000	0.425
	2.12335	260000	110000	0.424
	2.16835	275000	116000	0.423
	2.20835	289000	122000	0.422
	2.24835	304000	128000	0.42
	2.29335	320000	134000	0.418
	2.33335	336000	140000	0.417
	2.37335	353000	147000	0.416
	2.41835	370000	153000	0.414
	2.45835	388000	160000	0.412
	2.49835	406000	167000	0.412
	2.54335	424000	175000	0.411
	2.58335	444000	181000	0.408
	2.62335	464000	189000	0.408
	2.66835	484000	197000	0.407
	2.70835	505000	205000	0.406
	2.74835	527000	213000	0.404
	2.79335	550000	222000	0.403
	2.83335	574000	230000	0.401
	2.87335	598000	238000	0.398
	2.91835	622000	248000	0.398
	2.95835	649000	257000	0.396
	2.99835	676000	267000	0.395
	3.04335	705000	277000	0.392
	3.08335	735000	288000	0.391
	3.12335	767000	298000	0.389
	3.16835	800000	310000	0.388
	3.20835	836000	322000	0.385
	3.24835	872000	335000	0.384
	3.29335	911000	348000	0.383
	3.33335	953000	362000	0.38
	3.37335	996000	378000	0.379
	3.41835	1040000	394000	0.378
	3.45835	1090000	411000	0.376
	3.49835	1150000	431000	0.376
	3.54335	1200000	451000	0.375
	3.58335	1270000	475000	0.375
	3.62335	1340000	501000	0.374
	3.66835	1410000	528000	0.374
	3.70835	1500000	560000	0.374
	3.74835	1590000	594000	0.373
	3.79335	1700000	634000	0.374
	3.83335	1810000	679000	0.375
	3.87335	1940000	730000	0.376
	3.91835	2090000	786000	0.376
	3.95835	2260000	851000	0.377
	3.99835	2440000	923000	0.378
	4.04335	2650000	1000000	0.379
	4.08335	2890000	1100000	0.379
	4.12335	3160000	1200000	0.381
	4.16835	3450000	1320000	0.382
	4.20835	3810000	1470000	0.385
	4.24835	4220000	1640000	0.389
	4.29335	4680000	1840000	0.394
	4.33335	5230000	2090000	0.4
	4.37335	5870000	2380000	0.406
	4.41835	6680000	2760000	0.414
	4.45835	7630000	3220000	0.422
	4.49835	8800000	3780000	0.429
	4.54335	10200000	4440000	0.435
	4.58335	11900000	5220000	0.438
	4.62335	13900000	6090000	0.437
	4.66835	16300000	7060000	0.434
	4.70835	19000000	8120000	0.428
	4.74835	22000000	9230000	0.42
	4.79335	25300000	10400000	0.411
	4.83335	28900000	11600000	0.401
	4.87335	32700000	12800000	0.391
	4.91835	36800000	14000000	0.38
	4.95835	41000000	15100000	0.369
	4.99835	45400000	16300000	0.36
	5.04335	49900000	17500000	0.351
	5.08335	54500000	18600000	0.342
	5.12335	59300000	19800000	0.334
	5.16835	64100000	20900000	0.326
	5.20835	69100000	22100000	0.32
	5.24835	74100000	23200000	0.313
	5.29335	79100000	24300000	0.307
	5.33335	84200000	25400000	0.302
	5.37335	89500000	26600000	0.297
	5.41835	94800000	27800000	0.293
	5.45835	100000000	28800000	0.288
	5.49835	106000000	30000000	0.284
	5.54335	111000000	31100000	0.28
	5.58335	117000000	32300000	0.277
	5.62335	122000000	33400000	0.273
	5.66835	128000000	34600000	0.27
	5.70835	134000000	35800000	0.267
	5.74835	140000000	37000000	0.265
	5.79335	146000000	38200000	0.262
	5.83335	152000000	39400000	0.259
	5.87335	158000000	40600000	0.257
	5.91835	164000000	41900000	0.255
	5.95835	171000000	43200000	0.253
	5.99835	177000000	44500000	0.251
	6.04335	184000000	45900000	0.25
	6.08335	190000000	47200000	0.248
	6.13335	197000000	48600000	0.247
	6.18335	204000000	50000000	0.245
	6.23335	211000000	51500000	0.244
	6.23335	218000000	53100000	0.243
	6.28335	226000000	54700000	0.242
	6.33335	233000000	56400000	0.242
	6.38335	241000000	58200000	0.241
	6.43335	249000000	60300000	0.242
	6.48335	258000000	62400000	0.242
	6.48335	267000000	64800000	0.243
	6.53335	276000000	67500000	0.244
	6.58335	287000000	70300000	0.245
	6.63335	298000000	73500000	0.247
	6.68335	309000000	76700000	0.248
	6.73335	321000000	80000000	0.249
	6.73335	334000000	83600000	0.25
	6.78335	348000000	87400000	0.251
	6.83335	362000000	91400000	0.253
	6.88335	377000000	96000000	0.254
	6.93335	393000000	101000000	0.256
	6.98335	410000000	106000000	0.258
	6.98335	428000000	110000000	0.257
	7.03335	447000000	114000000	0.256
	7.08335	465000000	118000000	0.253
	7.13335	482000000	120000000	0.249
	7.18335	499000000	122000000	0.245
	7.23335	514000000	123000000	0.239
	7.23335	529000000	124000000	0.235
	7.28335	542000000	125000000	0.23
	7.33335	554000000	125000000	0.225
	7.38335	566000000	125000000	0.221
	7.43335	576000000	125000000	0.216
	7.48335	586000000	125000000	0.213
	7.48335	595000000	125000000	0.21
	7.53335	603000000	125000000	0.207
	7.58335	611000000	124000000	0.204
	7.63335	619000000	124000000	0.201
	7.68335	626000000	124000000	0.198
	7.73335	633000000	124000000	0.196
	7.73335	639000000	124000000	0.194
	7.78335	645000000	124000000	0.192
	7.83335	651000000	124000000	0.19
	7.88335	657000000	124000000	0.188
	7.93335	663000000	124000000	0.186
	7.98335	668000000	123000000	0.185
	7.98335	673000000	123000000	0.183
	8.03335	678000000	123000000	0.182
	8.08335	682000000	123000000	0.18
	8.13335	686000000	123000000	0.179
	8.18335	691000000	123000000	0.178
	8.23335	695000000	123000000	0.177
	8.23335	699000000	123000000	0.175
	8.28335	703000000	123000000	0.175
	8.33335	707000000	122000000	0.173
	8.38335	711000000	122000000	0.172
	8.43335	714000000	122000000	0.171
	8.48335	717000000	122000000	0.171
	8.48335	721000000	122000000	0.17
	8.53335	724000000	122000000	0.169
	8.58335	727000000	122000000	0.168
	8.63335	730000000	122000000	0.167
	8.68335	733000000	122000000	0.166
	8.73335	736000000	122000000	0.166
	8.73335	739000000	122000000	0.165
	8.78335	741000000	122000000	0.164
	8.83335	744000000	121000000	0.163
	8.88335	747000000	121000000	0.162
	8.93335	750000000	122000000	0.162
	8.98335	753000000	121000000	0.161
	8.98335	755000000	121000000	0.161
	9.03335	757000000	121000000	0.16
	9.08335	760000000	121000000	0.159
	9.13335	762000000	121000000	0.159
	9.18335	764000000	121000000	0.158
	9.23335	767000000	121000000	0.158
	9.23335	769000000	121000000	0.157
	9.28335	771000000	121000000	0.157
	9.33335	773000000	121000000	0.156
	9.38335	776000000	121000000	0.156
	9.43335	778000000	120000000	0.155
	9.48335	780000000	120000000	0.154
	9.48335	782000000	120000000	0.154
	9.53335	784000000	120000000	0.154
	9.58335	786000000	120000000	0.153
	9.63335	787000000	120000000	0.153
	9.68335	789000000	120000000	0.152
	9.73335	791000000	120000000	0.152
	9.73335	793000000	120000000	0.151
	9.78335	795000000	120000000	0.151
	9.83335	796000000	120000000	0.151
	9.88335	798000000	120000000	0.15
	9.93335	800000000	120000000	0.15
	9.98335	801000000	120000000	0.149
	9.98335	803000000	119000000	0.148
	10.0334	805000000	120000000	0.149
	10.0833	806000000	120000000	0.148
	10.1334	808000000	119000000	0.148
	10.1834	809000000	120000000	0.148
	10.2333	811000000	119000000	0.147
	10.2333	812000000	120000000	0.147
	10.2834	814000000	120000000	0.147
	10.3333	815000000	119000000	0.146
	10.3834	817000000	119000000	0.146
	10.4334	818000000	119000000	0.146
	10.4833	820000000	119000000	0.145
	10.4833	821000000	119000000	0.145
	10.5334	822000000	119000000	0.145
	10.5833	824000000	119000000	0.144
	10.6334	825000000	119000000	0.144
	10.6834	827000000	119000000	0.144
	10.7333	828000000	119000000	0.143
	10.7333	829000000	119000000	0.143
	10.7834	830000000	119000000	0.143
	10.8333	832000000	119000000	0.143
	10.8834	833000000	119000000	0.143
	10.9334	834000000	119000000	0.143
	10.9833	835000000	119000000	0.142
	10.9833	836000000	118000000	0.142

## Sheet: Palacos-NP-GEN
Palacos-NP-GEN
	time	G'	G"	tan delta
	[min]	[Pa]	[Pa]	[1]
	0.8333	18872	11189	0.593
	0.87515	24937	14004	0.562
	0.91665	31753	17005	0.536
	0.95815	39773	20210	0.508
	1.00015	47418	23635	0.498
	1.04165	55145	27058	0.491
	1.08315	62400	30108	0.483
	1.125	70856	33676	0.475
	1.16685	79172	37291	0.471
	1.20835	87615	40749	0.465
	1.24985	96488	44314	0.459
	1.29185	106000	47963	0.452
	1.33335	115000	51268	0.446
	1.37485	126000	54834	0.437
	1.41685	136000	59179	0.434
	1.45835	147000	63078	0.428
	1.49985	159000	66916	0.42
	1.54185	170000	71361	0.419
	1.58335	182000	75698	0.416
	1.62335	195000	79847	0.41
	1.66835	207000	84347	0.407
	1.70835	221000	88744	0.401
	1.74835	232000	92457	0.398
	1.79335	230000	95779	0.417
	1.83335	259000	100000	0.386
	1.87335	276000	105000	0.381
	1.91835	291000	111000	0.38
	1.95835	303000	115000	0.381
	1.99835	322000	120000	0.372
	2.04335	336000	123000	0.365
	2.08335	355000	129000	0.363
	2.12335	372000	135000	0.362
	2.16835	388000	141000	0.362
	2.20835	406000	145000	0.357
	2.24835	426000	151000	0.353
	2.29335	445000	156000	0.351
	2.33335	464000	162000	0.349
	2.37335	483000	167000	0.346
	2.41835	501000	173000	0.345
	2.45835	522000	178000	0.342
	2.49835	540000	184000	0.341
	2.54335	566000	191000	0.338
	2.58335	589000	198000	0.336
	2.62335	613000	207000	0.337
	2.66835	637000	214000	0.336
	2.70835	663000	222000	0.335
	2.74835	689000	231000	0.335
	2.79335	717000	240000	0.334
	2.83335	748000	251000	0.336
	2.87335	781000	261000	0.334
	2.91835	815000	274000	0.336
	2.95835	853000	287000	0.336
	2.99835	894000	300000	0.336
	3.04335	939000	316000	0.337
	3.08335	987000	333000	0.337
	3.12335	1040000	351000	0.337
	3.16835	1100000	370000	0.337
	3.20835	1160000	392000	0.337
	3.24835	1230000	417000	0.339
	3.29335	1300000	443000	0.34
	3.33335	1390000	470000	0.339
	3.37335	1480000	503000	0.341
	3.41835	1580000	537000	0.341
	3.45835	1680000	575000	0.341
	3.49835	1790000	607000	0.339
	3.54335	1930000	659000	0.342
	3.58335	2080000	713000	0.342
	3.62335	2250000	774000	0.344
	3.66835	2420000	838000	0.346
	3.70835	2630000	912000	0.347
	3.74835	2860000	1000000	0.351
	3.79335	3130000	1100000	0.351
	3.83335	3440000	1220000	0.355
	3.87335	3780000	1360000	0.359
	3.91835	4170000	1510000	0.361
	3.95835	4610000	1690000	0.366
	3.99835	5110000	1880000	0.368
	4.04335	5710000	2110000	0.37
	4.08335	6370000	2370000	0.373
	4.12335	7120000	2660000	0.374
	4.16835	7970000	2980000	0.374
	4.20835	8890000	3340000	0.375
	4.24835	9930000	3730000	0.376
	4.29335	11100000	4100000	0.369
	4.33335	12300000	4540000	0.367
	4.37335	13800000	4990000	0.362
	4.41835	15300000	5490000	0.359
	4.45835	16900000	6010000	0.355
	4.49835	18600000	6530000	0.35
	4.54335	20500000	7120000	0.347
	4.58335	22400000	7700000	0.343
	4.62335	24600000	8340000	0.34
	4.66835	26700000	8970000	0.335
	4.70835	29200000	9700000	0.333
	4.74835	31600000	10300000	0.327
	4.79335	34200000	11000000	0.323
	4.83335	37000000	11800000	0.319
	4.87335	39800000	12500000	0.315
	4.91835	42800000	13300000	0.311
	4.95835	45900000	14100000	0.306
	4.99835	49000000	14800000	0.302
	5.04335	52200000	15700000	0.301
	5.08335	55600000	16400000	0.295
	5.12335	59000000	17200000	0.291
	5.16835	62500000	18000000	0.288
	5.20835	65800000	19000000	0.288
	5.24835	69400000	19700000	0.285
	5.29335	73200000	20400000	0.278
	5.33335	77000000	21200000	0.276
	5.37335	80800000	22000000	0.272
	5.41835	84700000	22800000	0.27
	5.45835	88600000	23700000	0.268
	5.49835	92700000	24600000	0.266
	5.54335	96900000	25500000	0.263
	5.58335	101000000	26500000	0.262
	5.62335	105000000	27400000	0.26
	5.66835	110000000	28400000	0.258
	5.70835	115000000	29400000	0.257
	5.74835	119000000	30400000	0.255
	5.79335	124000000	31400000	0.253
	5.83335	129000000	32400000	0.251
	5.87335	134000000	33400000	0.249
	5.91835	139000000	34500000	0.248
	5.95835	144000000	35400000	0.246
	5.99835	149000000	36400000	0.244
	6.04335	154000000	37500000	0.242
	6.08335	160000000	38600000	0.241
	6.13335	165000000	39500000	0.239
	6.18335	171000000	40600000	0.238
	6.23335	176000000	41700000	0.237
	6.23335	181000000	42800000	0.236
	6.28335	187000000	43600000	0.233
	6.33335	193000000	44900000	0.233
	6.38335	199000000	46200000	0.233
	6.43335	205000000	47300000	0.231
	6.48335	211000000	48500000	0.23
	6.48335	217000000	49600000	0.229
	6.53335	223000000	50900000	0.228
	6.58335	229000000	52300000	0.228
	6.63335	236000000	53700000	0.228
	6.68335	242000000	55000000	0.227
	6.73335	249000000	56600000	0.227
	6.73335	256000000	58000000	0.226
	6.78335	263000000	59700000	0.227
	6.83335	271000000	61800000	0.228
	6.88335	279000000	63800000	0.229
	6.93335	287000000	66300000	0.231
	6.98335	297000000	69200000	0.233
	6.98335	306000000	71500000	0.234
	7.03335	317000000	75000000	0.237
	7.08335	328000000	78200000	0.238
	7.13335	340000000	81200000	0.239
	7.18335	352000000	84700000	0.241
	7.23335	365000000	88200000	0.241
	7.23335	379000000	92100000	0.243
	7.28335	393000000	96100000	0.244
	7.33335	408000000	101000000	0.247
	7.38335	424000000	106000000	0.249
	7.43335	442000000	111000000	0.251
	7.48335	459000000	116000000	0.253
	7.48335	478000000	122000000	0.255
	7.53335	498000000	127000000	0.254
	7.58335	518000000	132000000	0.255
	7.63335	538000000	137000000	0.254
	7.68335	558000000	140000000	0.251
	7.73335	578000000	144000000	0.249
	7.73335	597000000	147000000	0.246
	7.78335	616000000	150000000	0.243
	7.83335	634000000	151000000	0.238
	7.88335	650000000	152000000	0.234
	7.93335	665000000	153000000	0.23
	7.98335	680000000	154000000	0.226
	7.98335	693000000	154000000	0.221
	8.03335	707000000	156000000	0.22
	8.08335	718000000	155000000	0.215
	8.13335	729000000	154000000	0.212
	8.18335	739000000	155000000	0.21
	8.23335	750000000	155000000	0.207
	8.23335	759000000	155000000	0.205
	8.28335	768000000	155000000	0.202
	8.33335	777000000	155000000	0.2
	8.38335	785000000	155000000	0.197
	8.43335	793000000	155000000	0.195
	8.48335	801000000	155000000	0.193
	8.48335	808000000	155000000	0.192
	8.53335	814000000	156000000	0.191
	8.58335	821000000	155000000	0.188
	8.63335	827000000	155000000	0.187
	8.68335	837000000	158000000	0.189
	8.73335	839000000	154000000	0.184
	8.73335	755000000	121000000	0.161
	8.78335	757000000	121000000	0.16
	8.83335	760000000	121000000	0.159
	8.88335	762000000	121000000	0.159
	8.93335	764000000	121000000	0.158
	8.98335	767000000	121000000	0.158
	8.98335	769000000	121000000	0.157
	9.03335	771000000	121000000	0.157
	9.08335	773000000	121000000	0.156
	9.13335	776000000	121000000	0.156
	9.18335	778000000	120000000	0.155
	9.23335	780000000	120000000	0.154
	9.23335	782000000	120000000	0.154
	9.28335	784000000	120000000	0.154
	9.33335	786000000	120000000	0.153
	9.38335	787000000	120000000	0.153
	9.43335	789000000	120000000	0.152
	9.48335	791000000	120000000	0.152
	9.48335	793000000	120000000	0.151
	9.53335	795000000	120000000	0.151
	9.58335	796000000	120000000	0.151
	9.63335	798000000	120000000	0.15
	9.68335	800000000	120000000	0.15
	9.73335	801000000	120000000	0.149
	9.73335	803000000	119000000	0.148
	9.78335	805000000	120000000	0.149
	9.83335	806000000	120000000	0.148
	9.88335	808000000	119000000	0.148
	9.93335	809000000	120000000	0.148
	9.98335	811000000	119000000	0.147
	9.98335	812000000	120000000	0.147
	10.0334	814000000	120000000	0.147
	10.0833	815000000	119000000	0.146

## Sheet: Cemex Genta
Cemex Genta
	time	G'	G"	tan delta
	[min]	[Pa]	[Pa]
	1.15665	303000	207000	0.682
	1.1985	352000	228000	0.647
	1.24	425000	263000	0.619
	1.2815	512000	303000	0.591
	1.3235	603000	345000	0.572
	1.365	721000	398000	0.553
	1.4065	840000	450000	0.536
	1.4485	967000	505000	0.523
	1.49	1110000	563000	0.508
	1.5315	1260000	625000	0.497
	1.5735	1410000	691000	0.491
	1.615	1550000	767000	0.495
	1.655	1730000	823000	0.477
	1.7	1840000	880000	0.478
	1.74	1520000	760000	0.499
	1.78	2090000	1010000	0.484
	1.825	2320000	1060000	0.458
	1.865	2450000	1120000	0.457
	1.905	2600000	1180000	0.456
	1.95	2750000	1250000	0.454
	1.99	2910000	1310000	0.452
	2.03	3080000	1390000	0.45
	2.075	3250000	1450000	0.447
	2.115	3430000	1520000	0.444
	2.155	3600000	1590000	0.442
	2.2	3790000	1670000	0.44
	2.24	3970000	1740000	0.437
	2.28	4160000	1810000	0.435
	2.325	4350000	1880000	0.433
	2.365	4550000	1960000	0.431
	2.405	4750000	2030000	0.428
	2.45	4950000	2110000	0.426
	2.49	5160000	2190000	0.423
	2.53	5370000	2260000	0.421
	2.575	5580000	2340000	0.419
	2.615	5790000	2410000	0.417
	2.655	6000000	2490000	0.414
	2.7	6230000	2560000	0.411
	2.74	6450000	2640000	0.409
	2.78	6670000	2710000	0.406
	2.825	6900000	2780000	0.403
	2.865	7130000	2850000	0.4
	2.905	7350000	2930000	0.398
	2.95	7590000	3000000	0.395
	2.99	7820000	3070000	0.392
	3.03	8060000	3140000	0.389
	3.075	8300000	3210000	0.387
	3.115	8530000	3280000	0.384
	3.155	8770000	3350000	0.381
	3.2	9020000	3420000	0.379
	3.24	9280000	3490000	0.376
	3.28	9530000	3570000	0.374
	3.325	9800000	3640000	0.372
	3.365	10100000	3730000	0.37
	3.405	10400000	3810000	0.368
	3.45	10600000	3900000	0.367
	3.49	10900000	3990000	0.365
	3.53	11200000	4090000	0.364
	3.575	11600000	4200000	0.363
	3.615	11900000	4310000	0.363
	3.655	12300000	4440000	0.362
	3.7	12600000	4570000	0.362
	3.74	13000000	4710000	0.362
	3.78	13400000	4880000	0.363
	3.825	13900000	5050000	0.364
	3.865	14400000	5240000	0.365
	3.905	14900000	5440000	0.366
	3.95	15400000	5670000	0.367
	3.99	16100000	5920000	0.369
	4.03	16700000	6200000	0.37
	4.075	17500000	6500000	0.372
	4.115	18300000	6840000	0.373
	4.155	19300000	7220000	0.374
	4.2	20400000	7640000	0.375
	4.24	21600000	8170000	0.379
	4.28	23100000	8990000	0.389
	4.325	25200000	10400000	0.412
	4.365	28500000	12600000	0.443
	4.405	33400000	15600000	0.467
	4.45	39800000	18800000	0.471
	4.49	47400000	21700000	0.457
	4.53	55500000	24000000	0.433
	4.575	63500000	26000000	0.409
	4.615	71400000	27400000	0.384
	4.655	78800000	28500000	0.361
	4.7	85800000	29400000	0.343
	4.74	92200000	30100000	0.327
	4.78	98300000	30600000	0.311
	4.825	104000000	31300000	0.3
	4.865	109000000	31500000	0.288
	4.905	114000000	31800000	0.278
	4.95	119000000	32000000	0.269
	4.99	124000000	32300000	0.261
	5.03	128000000	32500000	0.254
	5.075	132000000	32700000	0.248
	5.115	136000000	32800000	0.242
	5.155	139000000	33000000	0.237
	5.2	143000000	33200000	0.232
	5.24	146000000	33400000	0.228
	5.28	149000000	33500000	0.224
	5.325	153000000	33700000	0.221
	5.365	156000000	33900000	0.218
	5.405	159000000	34000000	0.215
	5.45	161000000	34200000	0.212
	5.49	164000000	34400000	0.209
	5.53	167000000	34500000	0.207
	5.575	170000000	34700000	0.205
	5.615	172000000	34900000	0.203
	5.655	175000000	35100000	0.201
	5.7	177000000	35200000	0.199
	5.74	180000000	35400000	0.197
	5.78	182000000	35600000	0.196
	5.825	184000000	35800000	0.194
	5.865	186000000	36000000	0.193
	5.905	189000000	36100000	0.191
	5.95	191000000	36300000	0.19
	5.99	193000000	36400000	0.189
	6.03	195000000	36600000	0.188
	6.075	197000000	36800000	0.186
	6.115	199000000	36900000	0.185
	6.165	202000000	37100000	0.184
	6.215	203000000	37300000	0.183
	6.265	205000000	37500000	0.183
	6.265	207000000	37600000	0.181
	6.315	209000000	37800000	0.181
	6.365	211000000	38000000	0.18
	6.415	213000000	38200000	0.179
	6.465	215000000	38300000	0.178
	6.515	217000000	38500000	0.178
	6.515	219000000	38700000	0.177
	6.565	221000000	38800000	0.176
	6.615	222000000	39000000	0.176
	6.665	224000000	39200000	0.175
	6.715	226000000	39400000	0.174
	6.765	227000000	39500000	0.174
	6.765	229000000	39700000	0.173
	6.815	231000000	39900000	0.173
	6.865	233000000	40100000	0.172

## Sheet: Cemex-NP-GEN
Cemex-NP-GEN
	time	G'	G"	tan delta
	[min]	[Pa]	[Pa]
	1.15165	1270000	651000	0.515
	1.1935	1460000	734000	0.501
	1.235	1670000	846000	0.505
	1.2765	1940000	964000	0.497
	1.3185	2270000	1100000	0.486
	1.36	2630000	1250000	0.475
	1.4015	3010000	1390000	0.463
	1.4435	3430000	1550000	0.452
	1.485	3850000	1710000	0.444
	1.5265	4290000	1860000	0.434
	1.5685	4740000	2020000	0.426
	1.61	5210000	2180000	0.419
	1.65	5670000	2350000	0.413
	1.695	6120000	2510000	0.41
	1.735	6600000	2670000	0.404
	1.775	7090000	2820000	0.398
	1.82	7570000	2970000	0.393
	1.86	7920000	3120000	0.395
	1.9	7940000	3180000	0.4
	1.945	8500000	3300000	0.389
	1.985	8750000	3410000	0.39
	2.025	9580000	3570000	0.373
	2.07	9830000	3670000	0.374
	2.11	10900000	3880000	0.357
	2.15	11500000	4040000	0.351
	2.195	12100000	4180000	0.345
	2.235	12700000	4320000	0.339
	2.275	13400000	4460000	0.334
	2.32	14000000	4600000	0.329
	2.36	14600000	4730000	0.324
	2.4	15200000	4870000	0.32
	2.445	15800000	4980000	0.316
	2.485	16400000	5100000	0.312
	2.525	17000000	5220000	0.307
	2.57	17600000	5340000	0.303
	2.61	18200000	5450000	0.3
	2.65	18800000	5550000	0.296
	2.695	19400000	5650000	0.292
	2.735	19900000	5770000	0.29
	2.775	20500000	5870000	0.286
	2.82	21100000	5960000	0.282
	2.86	21700000	6080000	0.28
	2.9	22300000	6190000	0.278
	2.945	22900000	6280000	0.274
	2.985	23500000	6410000	0.273
	3.025	24200000	6520000	0.27
	3.07	24800000	6630000	0.268
	3.11	25400000	6740000	0.265
	3.15	26100000	6890000	0.264
	3.195	26800000	7000000	0.261
	3.235	27500000	7140000	0.26
	3.275	28200000	7260000	0.258
	3.32	28900000	7420000	0.257
	3.36	29800000	7560000	0.254
	3.4	30600000	7730000	0.253
	3.445	31500000	7900000	0.251
	3.485	32500000	8100000	0.249
	3.525	33600000	8390000	0.25
	3.57	34900000	8720000	0.25
	3.61	36400000	9160000	0.252
	3.65	38100000	9830000	0.258
	3.695	40400000	10900000	0.271
	3.735	43600000	12800000	0.295
	3.775	48200000	15800000	0.327
	3.82	55000000	19800000	0.361
	3.86	64000000	24300000	0.38
	3.9	74700000	28500000	0.381
	3.945	86100000	32000000	0.371
	3.985	97600000	34700000	0.355
	4.025	109000000	36600000	0.337
	4.07	119000000	37900000	0.319
	4.11	128000000	38900000	0.303
	4.15	137000000	39600000	0.289
	4.195	145000000	40100000	0.277
	4.235	152000000	40500000	0.266
	4.275	159000000	40700000	0.256
	4.32	165000000	41100000	0.249
	4.36	171000000	41200000	0.241
	4.4	177000000	41400000	0.234
	4.445	182000000	41700000	0.229
	4.485	187000000	41800000	0.224
	4.525	192000000	42000000	0.219
	4.57	196000000	42100000	0.215
	4.61	201000000	42200000	0.21
	4.65	204000000	42400000	0.208
	4.695	208000000	42500000	0.204
	4.735	212000000	42700000	0.201
	4.775	216000000	42900000	0.199
	4.82	219000000	43100000	0.197
	4.86	223000000	43100000	0.193
	4.9	226000000	43400000	0.192
	4.945	230000000	43500000	0.19
	4.985	233000000	43700000	0.188
	5.025	236000000	43900000	0.186
	5.07	239000000	44000000	0.184
	5.11	242000000	44400000	0.184
	5.15	245000000	44000000	0.18
	5.195	247000000	44600000	0.18
	5.235	250000000	44800000	0.179
	5.275	253000000	44800000	0.177
	5.32	256000000	45200000	0.177
	5.36	258000000	45400000	0.176
	5.4	261000000	45700000	0.175
	5.445	263000000	45700000	0.173
	5.485	266000000	45700000	0.172
	5.525	268000000	45900000	0.171
	5.57	271000000	46100000	0.17
	5.61	273000000	46200000	0.169
	5.65	275000000	46200000	0.168
	5.695	278000000	46400000	0.167
	5.735	280000000	46600000	0.167
	5.775	282000000	46600000	0.165
	5.82	284000000	46900000	0.165
	5.86	286000000	46900000	0.164
	5.9	288000000	47100000	0.163
	5.945	290000000	47000000	0.162
	5.985	292000000	47100000	0.161
	6.025	294000000	47100000	0.16
	6.07	296000000	47300000	0.16
	6.11	298000000	47400000	0.159
	6.16	299000000	47400000	0.158
	6.21	301000000	47500000	0.158
	6.26	303000000	47500000	0.157
	6.26	305000000	47700000	0.157
	6.31	306000000	47700000	0.156
	6.36	308000000	47600000	0.155
	6.41	309000000	47800000	0.154
	6.46	311000000	47900000	0.154
	6.51	313000000	47800000	0.153
	6.51	314000000	47900000	0.153
	6.56	316000000	48100000	0.152
	6.61	317000000	48000000	0.151
	6.66	319000000	48100000	0.151
	6.71	320000000	48100000	0.15
	6.76	322000000	48100000	0.15
	6.76	323000000	48200000	0.149
	6.81	324000000	48300000	0.149
	6.86	325000000	48400000	0.149
	6.91	327000000	48300000	0.148
	6.96	328000000	48500000	0.148
	7.01	329000000	48400000	0.147
	7.01	330000000	48600000	0.147
	7.06	332000000	48600000	0.146
	7.11	333000000	48600000	0.146
	7.16	334000000	48600000	0.145
	7.21	335000000	48600000	0.145
	7.26	336000000	48800000	0.145
	7.26	337000000	48700000	0.144
	7.31	339000000	48700000	0.144
	7.36	340000000	48500000	0.143
	7.41	341000000	48900000	0.144
	7.46	342000000	48800000	0.143
	7.51	343000000	48800000	0.142
	7.51	344000000	48700000	0.142
	7.56	344000000	48900000	0.142
	7.61	345000000	48900000	0.142
	7.66	347000000	48700000	0.141
	7.71	347000000	48800000	0.141
	7.76	348000000	49000000	0.141
	7.76	349000000	49100000	0.141
	7.81	349000000	49000000	0.14
	7.86	350000000	49200000	0.14
	7.91	351000000	49000000	0.14
