# Supplementary material for: LbL-assembled gentamicin delivery system for PMMA bone cements to prolong antimicrobial activity
Source: PLoS One. 2018 Dec 13;13(12):e0207753. doi: 10.1371/journal.pone.0207753 (PMC6292632; doi:10.1371/journal.pone.0207753)
Supplement: S2 Table — (XLSX) [file pone.0207753.s002.xlsx]

## Sheet: GEN release
		Cemex-NP-GEN			Cemex Genta			Palacos-NP-GEN			Palacos R+G
time (day)		GEN conc	SD		GEN conc	SD		GEN conc	SD		GEN conc	SD
1		285.9	68.6218		309.15	80.9513		48.6045	6.7245		145.133	49.6732
2		113.963	11.4754		41.5755	2.6961		24.0792	9.8781		10.9412	0.2714
3		76.0796	9.3746		7.7579	3.7253		23.4299	2.7662		4.541	1.9845
4		60.5932	2.0863		6.0338	1.9925		8.6076	1.5681		1.8594	1.6487
5		51.6911	11.1713		4.3738	2.8002		6.9697	1.9226		2.1085	1.327
6		47.747	1.4427		3.1538	1.8438		1.9704	1.4537		1.2743	0.9987
7		21.3603	6.4286		2.0725	1.1101		1.0765	0.8288		0.1229	0.5371
8		19.7687	5.9516		2.932	1.2731		2.0222	1.3982		0.2265	0.7337
9		33.3883	4.4015		2.6003	1.2055		1.2746	0.8093		0.1875	1.0647
10		23.6764	4.7875		2.744	1.0462		1.857	1.6677		1.4585	1.7233
11		24.3438	2.4003		2.9812	3.2306		0.5683	0.623		0.4427	0.3686
12		16.6079	0.6844		4.0576	3.4489		0.8628	0.5813		0.00093889	0.726
13		17.6692	0.6668		1.985	0.7624		0.0283	0.4498
14		19.5256	2.2047		2.7939	1.6307		0.4836	0.6402
15		10.2119	4.7317		4.8599	3.5903		0.1299	0.2643
16		10.5068	7.8414		2.8847	0.5596		0.08	0.5342
17		20.8105	3.4029		2.107	0.8064		0.1644	0.2125
18		17.0773	1.1678		0.9892	0.3836
19		7.7887	2.0847
20		4.0437	1.0567
21		10.7735	2.6231
22		11.6046	2.4005
23		4.4772	0.6925
24		2.7704	0.3649
25		1.7107	2.143
26		0.9984	0.8141
27		1.0258	0.3402
28		0.4133	0.6255
29		0.3668	0.3779
30		0.1015	0.2831
