# Supplementary material for: LbL-assembled gentamicin delivery system for PMMA bone cements to prolong antimicrobial activity
Source: PLoS One. 2018 Dec 13;13(12):e0207753. doi: 10.1371/journal.pone.0207753 (PMC6292632; doi:10.1371/journal.pone.0207753)
Supplement: S3 Table — (XLSX) [file pone.0207753.s003.xlsx]

## Sheet: Length antimicrobial activity
strain		Cemex Genta		Cemex-NP-GEN		Palacos R+G		Palacos-NP-GEN
S. aureus NCIMB9518		18.5		23.4		12.5		14.5
S. aureus ATCC9144		12.6		23.2		6.3		6.3
MRSA NCTC12493		17.3		24		6.5		6
S. epidermidis ATCC12228		22.3		23.2		20.5		20.3
S. pyogenes ATCC 12344		15.3		22.7		13.5		13.6
A. baumannii NCIMB 9214		15.5		23.3		7.6		6.2
E. coli NCTC10418		15.8		21.5		8		13.3
P. aeruginosa PA01		22.8		23.5		19.5		21.7
S. pneumoniae 59413		6		14.5		5.3		5.5
P. aeruginosa 59224		20.5		23.3		10.6		15.3
S. epidermidis 59174		21.3		21.6		19.5		21.6
E. coli 59284		10.5		14.7		8.2		8.5
