# Supplementary material for: LbL-assembled gentamicin delivery system for PMMA bone cements to prolong antimicrobial activity
Source: PLoS One. 2018 Dec 13;13(12):e0207753. doi: 10.1371/journal.pone.0207753 (PMC6292632; doi:10.1371/journal.pone.0207753)
Supplement: S4 Table — (XLSX) [file pone.0207753.s004.xlsx]

## Sheet: MTT
	Palacos R+G		Palacos-NP-GEN		Cemex Genta		Cemex-NP-GEN
	OD560	SD	OD560	SD	OD560	SD	OD560	SD
1 day	0.41	0.06	0.428	0.0961	0.306	0.0329	0.3576	0.0595
2 days	0.4176	0.0206	0.4272	0.0671	0.3756	0.0626	0.426	0.054
4 days	0.3816	0.041	0.4512	0.0276	0.456	0.15	0.48	0.0734
7 days	0.294	0.078	0.312	0.1046	0.384	0.024	0.366	0.0433

## Sheet: viability LDH
	Palacos R+G		Palacos-NP-GEN		Cemex Genta		Cemex-NP-GEN
	LDH release/total LDH	SD	LDH release/total LDH	SD	LDH release/total LDH	SD	LDH release/total LDH	SD
1 day	48.2517	1.0103	46.8113	0.9844	42.7117	6.2749	44.1663	1.6803
2 days	72.283	3.8144	70.4857	2.0885	74.2335	7.0195	70.5257	4.531
4 days	88.5631	5.0128	82.3744	7.1952	84.8076	15.446	83.2863	6.8009
7 days	71.5094	5.0576	79.8017	5.936	79.6012	2.7286	83.9281	3.6081

## Sheet: A red
		OD450	SD
Palacos R+G		0.159	0.042
Palacos-NP-GEN		0.205	0.025
Cemex Genta		0.197	0.025
Cemex-NP-GEN		0.216	0.049
