# Supplementary material for: LbL-assembled gentamicin delivery system for PMMA bone cements to prolong antimicrobial activity
Source: PLoS One. 2018 Dec 13;13(12):e0207753. doi: 10.1371/journal.pone.0207753 (PMC6292632; doi:10.1371/journal.pone.0207753)
Supplement: S5 Table — (XLSX) [file pone.0207753.s005.xlsx]

## Sheet: compressive strength
	t = 3 month		t = 0
	Compressive strngth (Mpa)	SD	Compressive strngth (Mpa)	SD
Palacos-G	73.9	2.3	79.3	4.2
Palacos-NP-GEN	73.4	4.3	78	5.7
Cemex-G	55.7	1.5	73.7	1.1
Cemex-NP-GEN	54.99	7.9	61.3	5.9
