# Supplementary material for: LbL-assembled gentamicin delivery system for PMMA bone cements to prolong antimicrobial activity
Source: PLoS One. 2018 Dec 13;13(12):e0207753. doi: 10.1371/journal.pone.0207753 (PMC6292632; doi:10.1371/journal.pone.0207753)
Supplement: S6 Table — (XLSX) [file pone.0207753.s006.xlsx]

## Sheet: PBS uptake
time (hour^.5)	% change Cemex Genta	SD	% change Cemex-NP-GEN	SD
0	0	0	0	0		0
1.4114	6.1199	1.6426	11.7849	2.8229		0.0830021
2.4495	6.8263	2.219	12.1491	3.1336		0.250002
4.899	7.4707	1.9102	13.5273	2.5974		1.00001
6.9282	11.0171	1.76	16.5509	5.4881		2
8.4853	11.6835	3.1334	18.7073	8.1585		3.00001
9.798	10.2164	3.7721	15.3532	2.099		4.00003
10.9545	9.9491	1.6232	13.5215	1.1456		5.00004
12	11.8607	2.4425	16.8057	2.8856		6
12.9615	9.6057	1.6405	15.3348	3.931		7.00002
14.6969	10.2499	2.4417	14.4297	0.6493		8.99995
16.2481	11.5538	1.4225	16.0447	3.0652		11
17.6635	11.2419	1.2898	14.6531	2.5366		13
18.9737	16.6508	1.0484	18.775	4.3388		15.0001
20.7846	11.5192	0.4574	17.0146	3.6136		18
22.4499	18.7968	6.6207	16.9335	3.2503		20.9999
24	11.7924	0.8663	14.3981	3.385		24
26.3818	11.7851	1.6907	12.9953	3.463		29
28.9828	12.392	1.8198	15.3756	2.5574		35.0001
